# Supplementary material for: Investigating the Immune-Stimulating Potential of β-Glucan from Aureobasidium pullulans in Cancer Immunotherapy
Source: PubMed Central journal article supplement — Biomol Ther (Seoul). 2024 Aug 2;32(5):556–67. doi: 10.4062/biomolther.2024.047 (PMC11392664; doi:10.4062/biomolther.2024.047), 2024-08-02
Supplement: bt-32-5-556-supple.pdf [file bt-32-5-556-supple.pdf]

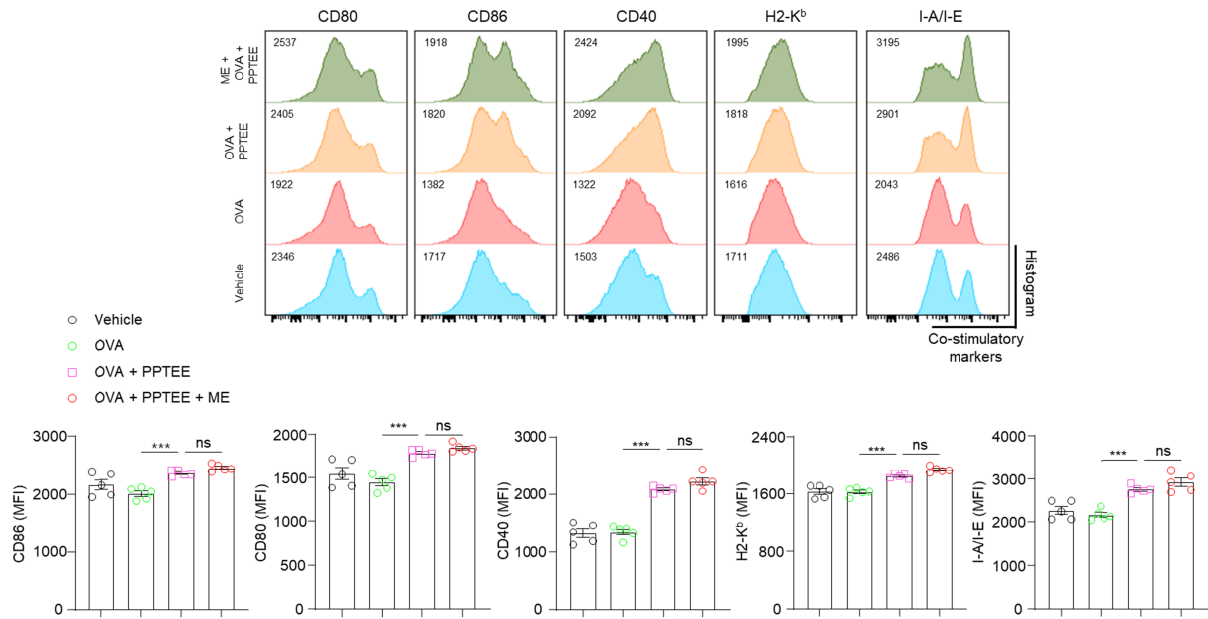

**Figure S1. ME formulation has little effect on the activation of antigen-presenting cells by PPTEE-glucan in vitro.** The BMDC were stimulated with OVA alone, OVA + PPTEE and OVA + PPTEE + ME for 24 hrs. Representative histograms and MFI of co-stimulatory markers (CD80, CD86, CD40, H2-K<sup>b</sup> and I-A/I-E) on BMDC were analyzed by flowcytometry. Data are presented as mean  $\pm$  SEM ( $n = 5$ ).

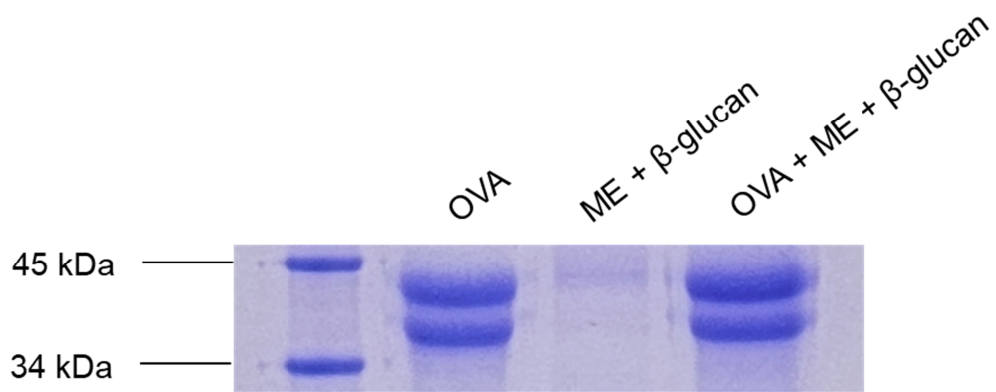

**Figure S2. OVA + ME contains a similar amount of OVA compared to the OVA-only control.** OVA contents in OVA, ME +  $\beta$ -glucan and OVA + ME +  $\beta$ -glucan samples were assessed by using Coomassie Blue staining.

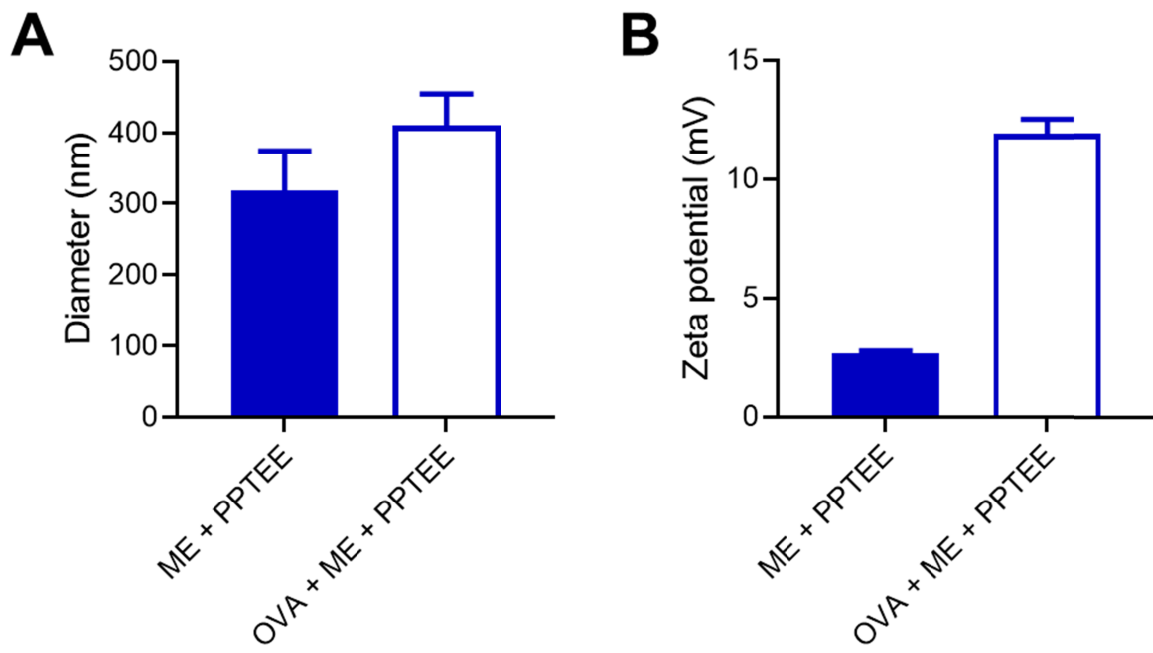

**Figure S3. Particle properties of ME formulations.** (A) Hydrodynamic size values (according to the intensity distribution data) of ME + PPTEE and OVA + ME + PPTEE. (B) Zeta potential data of ME + PPTEE and OVA + ME + PPTEE. Data are presented as mean  $\pm$  SD ( $n = 3$ ).

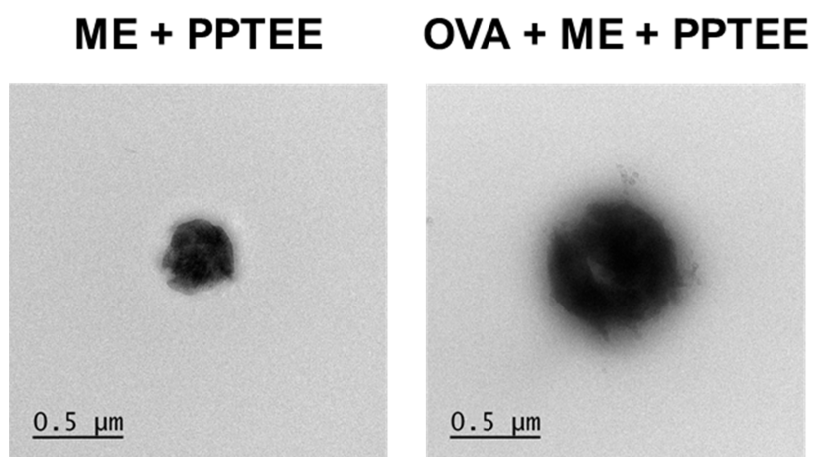

**Figure S4. TEM images of ME + PPTEE and OVA + ME + PPTEE groups. Bar graph: 500 nm.**

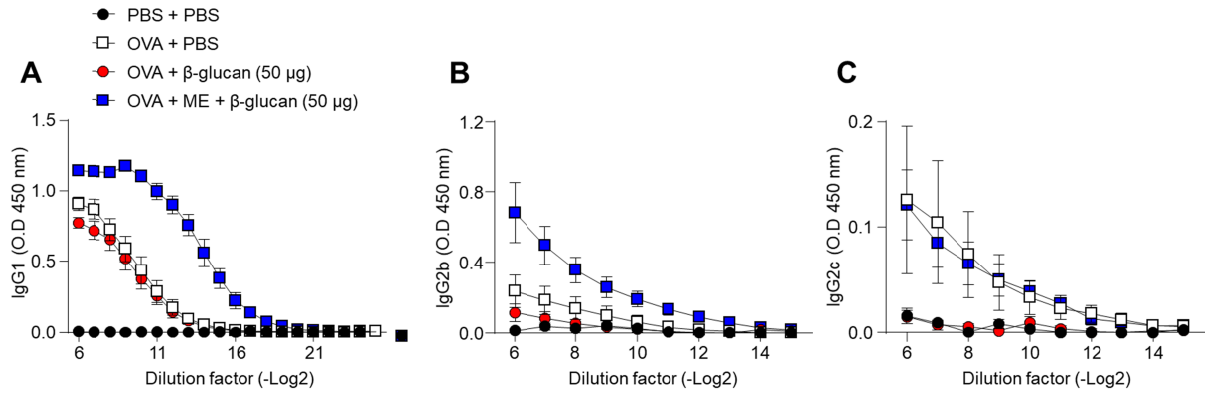

**Figure S5. Un-formulated OVA +  $\beta$ -glucan failed to vaccinate the mice.** Mice were intramuscularly injected 3 times for every 2 weeks with OVA, OVA +  $\beta$ -glucan and OVA + ME +  $\beta$ -glucan, respectively. Serum collected 42 days post first vaccination, and serum IgG1 (A), IgG2b (B) and IgG2c (C) were measured using ELISA. Data are presented as mean  $\pm$  SEM ( $n = 5$ ).
